# Supplementary material
Source: PubMed Central journal article supplement (PMC6707894)
Supplement: NIHMS1530288-supplement-1.pdf [file NIHMS1530288-supplement-1.pdf]

## Supplemental Material

**Supplemental Table S1.** The association of IR on MWF in brain regions in subsample (n=121)

| Region                                    | Coordinates<br>(millimeters) | T-Value | Observed<br>extent<br>threshold | Cluster<br>level p-<br>value |
|-------------------------------------------|------------------------------|---------|---------------------------------|------------------------------|
| <b>IR positive direction cluster data</b> |                              |         |                                 |                              |
| Inferior portion of anterior cingulate    | 0, 36, -12                   | 4.76    | 433                             | .006                         |
| Right inferior temporal gyrus             | 32, 14, -40                  | 4.31    | 1071                            | .000                         |
| Right superior temporal region            | 48, -6, -16                  | 4.10    | 599                             | .002                         |

Extent threshold (k) = 174 voxels,  $p < .005$ , uncorrected for positive and negative directional multiple regression analyses. All voxel-level p-values were  $p < .005$ .

Abbreviations: MWF = myelin water fraction; IR = insulin resistance.

**Supplemental Table S2.** The association of insulin on MWF in brain regions in subsample (n=121)

| Region                                         | Coordinates<br>(millimeters) | T-Value | Observed<br>extent<br>threshold | Cluster<br>level p-<br>value |
|------------------------------------------------|------------------------------|---------|---------------------------------|------------------------------|
| <b>Insulin positive direction cluster data</b> |                              |         |                                 |                              |
| Inferior portion of the anterior cingulate     | 0, 36, -12                   | 4.88    | 675                             | .001                         |
| Right hippocampal region                       | 28, -10, -22                 | 4.54    | 1931                            | .000                         |
| Left fusiform gyral area                       | -32, 2, -34                  | 3.61    | 248                             | .028                         |

Extent threshold (k) = 174 voxels,  $p < .005$ , uncorrected for positive and negative directional multiple regression analyses. All voxel-level p-values were  $p < .005$ .

Abbreviation: MWF = myelin water fraction.

**Supplemental Figure S1:** Multi-slice rendering of voxelwise associations between MWF and A) Insulin and B) HOMA-IR performed in subset of non-outliers (n=121). T-statistics are displayed. Similar relationships between MWF and Insulin and HOMA-IR are observed, compared to analyses of full sample, however, the main effects in the negative direction (blue) appear to be attenuated.

**Supplemental Figure S2:** Multi-slice rendering of voxelwise APOE4 x IR interaction on MWF. T-statistics are displayed. While not surviving correction for multiple comparison, a cluster spanning the middle frontal and precentral gyri was observed, such that the association between HOMA-IR and MWF differed in APOE4 carriers and non-carriers. The mean MWF vs. HOMA-IR for APOE4 carriers and non-carriers is displayed in the corresponding scatter plot.

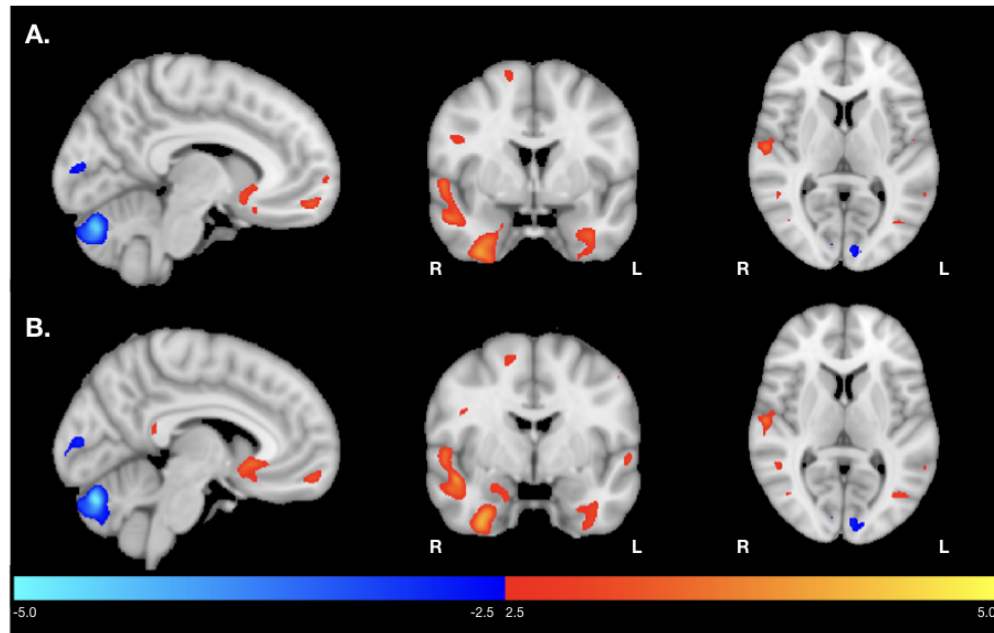

Supplemental Figure 1: Multi-slice rendering of voxelwise associations between MWF and A) Insulin and B) HOMA-IR performed in subset of non-outliers (n=121). T-statistics are displayed. Similar relationships between MWF and Insulin and HOMA-IR are observed, compared to analyses of full sample, however, the main effects in the negative direction (blue) appear to be attenuated.

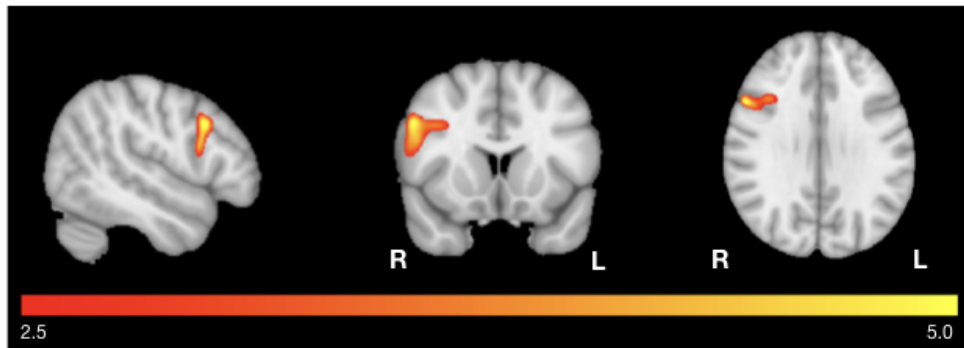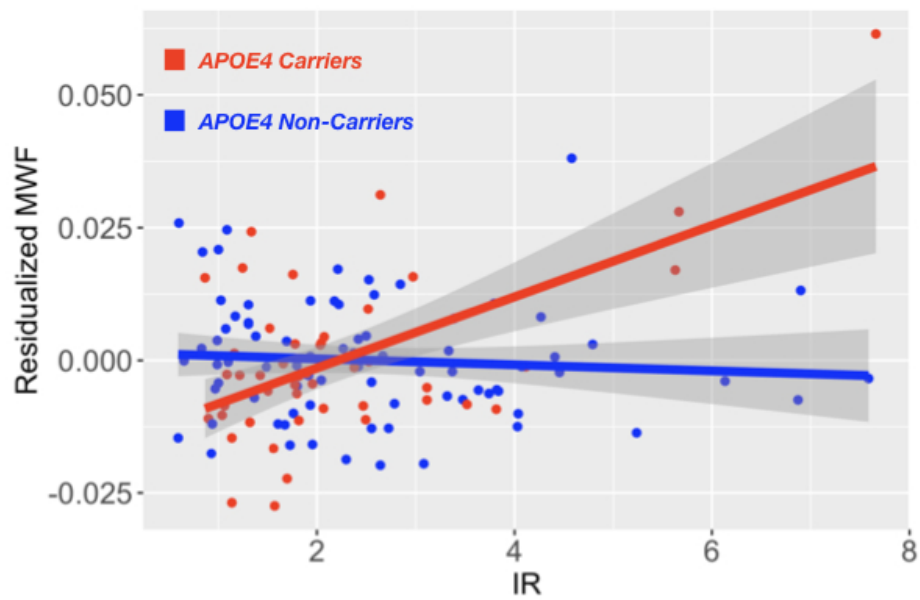

Supplemental Figure 2: Multi-slice rendering of voxelwise APOE4 x IR interaction on MWF. T-statistics are displayed. While not surviving correction for multiple comparison, a cluster spanning the middle frontal and precentral gyri was observed, such that the association between HOMA-IR and MWF differed in APOE4 carriers and non-carriers. The mean MWF vs. HOMA-IR for APOE4 carriers and non-carriers is displayed in the corresponding scatter plot.
